# Supplementary material
Source: Springer Nature journal article supplement (https://www.springermedizin.de/resource/supplementary/13098_2014_371_MOESM1_ESM.pdf/9670916)
Supplement: MOESM1 [file 9670916]

## Identification

No of citations identified  
through database search  
n = 502

No of citations excluded  
n = 361

## Screening

No of abstracts screened  
n = 141

No of abstracts excluded  
n = 33

No of full text retrieved  
n = 108

No of duplicates excluded  
n = 59

## Eligibility

No of full text articles  
assessed for eligibility  
n = 49

No of full text articles excluded  
n = 42

Main reasons for exclusion:  
- Animal studies  
- Missing data for fish intake  
- Missing criteria for MetS

## Inclusion

No of studies included  
n = 7
